# Supplementary material
Source: PubMed Central journal article supplement (PMC4362967)

1 **Supplemental Information**

2

3 **Supplemental Data:**

4

5 **Table S1, related to Figure 1. Characterization of the most potent D-enantiomeric peptides**  
6 **against *Pseudomonas aeruginosa* PA14 biofilms.** MBIC<sub>50</sub> values were determined using the 96-  
7 well plate biofilm assay and correspond to the ability of the peptides to prevent biofilm formation  
8 by 50%. The lowest MBIC<sub>50</sub> values obtained are shown in bold.

| <b>Peptide name</b> | <b>Amino acid sequence</b> | <b>MIC (µg/ml)</b> | <b>MBIC<sub>50</sub> (µg/ml)</b> |
|---------------------|----------------------------|--------------------|----------------------------------|
| DJK1                | VFLRRIRVIVIR               | 20                 | 10                               |
| DJK2                | VFWRRIRVWVIR               | 10                 | 5                                |
| <b>DJK5</b>         | VQWRAIRVRVIR               | 16                 | <b>1</b>                         |
| <b>DJK6</b>         | VQWRRIRVWVIR               | 16                 | <b>0.5</b>                       |
| RI-1002             | KRIRWVILWRQV               | 10                 | 5                                |
| RI-1018             | RRWIRVAVILRV               | 20                 | 10                               |

9

10

11 **Table S2, related to Figure 1. MICs (for planktonic cells) and MBIC<sub>50</sub> (vs. biofilms; blue**  
 12 **highlight) of various strains.** The strains included a high proportion of multi-drug resistant  
 13 (MDR; resistant to >4 classes of antibiotics), XDR (resistant to most classes of antibiotics); DR  
 14 resistant to 1-3 classes; and polymyxin resistant (PXR) isolates. NB. 1. The microtiter plate biofilm  
 15 method underestimates activity by up to 10-fold relative to the flow cell method. 2. MBIC<sub>50</sub> was  
 16 determined as the concentration reducing biofilm by 50% as there was not a clean cut-off as  
 17 observed with planktonic cells but rather a steady decrease in biofilm formation over a 2-8 fold  
 18 concentration range.

| Species                         | Bacterial strains | Phenotype                       | 1018        |              | DJK5        |              | DJK6        |              |
|---------------------------------|-------------------|---------------------------------|-------------|--------------|-------------|--------------|-------------|--------------|
|                                 |                   |                                 | MIC (µg/ml) | MBIC (µg/ml) | MIC (µg/ml) | MBIC (µg/ml) | MIC (µg/ml) | MBIC (µg/ml) |
| <i>Acinetobacter baumannii</i>  | ATTC 17987        | Wild type                       | >128        | 8            | 8           | 1            | 4           | 1            |
|                                 | SENTRY C2         | XDR; PXR                        | >128        | 32           | 16          | 8            | 8           | 4            |
|                                 | SENTRY C5         | MDR; PXR                        | >128        | 128          | 16          | 8            | 16          | 4            |
|                                 | SENTRY C8         | DR; PXR                         | >128        | 2            | 8           | 4            | 8           | 2            |
|                                 | SENTRY C11        | MDR; PXR                        | >128        | 64           | 8           | 4            | 8           | 4            |
|                                 | SENTRY C12        | MDR; PXR                        | >128        | 128          | 16          | 8            | 8           | 4            |
|                                 | SENTRY C13        | MDR; PXR                        | >128        | 64           | 16          | 8            | 16          | 4            |
|                                 | SENTRY C14        | DR; PXR                         | >128        | 16           | 16          | 8            | 8           | 2            |
|                                 | SENTRY C15        | MDR; PXR                        | >128        | 64           | 16          | 8            | 16          | 4            |
| SENTRY C87                      | XDR; PXR          | >128                            | 4           | 8            | 4           | 4            | 1           |              |
| <i>Burkholderia cenocepacia</i> | 4813              | MDR                             | >256        | 2            | >256        | 0.4          | >64         | 2            |
| <i>Enterobacter cloacae</i>     | 218R              | Derepressed Class C β-lactamase | 64          | 2            | 32          | 2            | 16          | 2            |
| <i>Escherichia coli</i>         | 0157              | WT                              | 32          | 8            | 1.6         | 0.8          | 16          | 8            |
|                                 | HB101             | WT                              | 32          | 16           | 16          | 4            | 8           | 2            |
|                                 | VGH10             | MDR                             | 256         | 1            | 8           | 4            | 8           | 2            |
|                                 | VGH11             | MDR                             | 64          | 32           | 16          | 4            | 8           | 8            |
|                                 | VGH1              | MDR                             | 64          | 32           | 8           | 2            | 16          | 8            |
| <i>Klebsiella pneumoniae</i>    | KPLN649           | WT                              | 32          | 1            | 3.2         | 1.6          | 4           | 2            |
|                                 | 1549216           | WT                              | >64         | 8            | >64         | 2            | 32          | 2            |
| <i>Pseudomonas aeruginosa</i>   | PA01              | WT                              | 64          | 8            | 16          | 2            | 16          | 1            |
|                                 | PA14              | WT                              | 32          | 8            | 16          | 1            | 16          | 0.5          |
|                                 | Brazil #21        | MDR; PXR                        | 64          | 8            | 16          | 4            | >16         | 16           |
|                                 | Brazil #36        | MDR; PXR                        | 64          | 4            | 8           | 0.5          | 16          | 0.5          |
|                                 | Brazil #172       | MDR; PXR                        | 64          | 32           | >16         | 0.5          | 16          | 1            |
|                                 | Brazil #205       | MDR; PXR                        | 64          | 4            | 8           | 0.5          | 16          | 8            |
|                                 | Brazil #211       | MDR; PXR                        | 64          | 32           | >16         | 0.5          | 8           | 0.5          |
|                                 | LES400 - 27       | MDR                             | 16          | 2            | 8           | 2            | 4           | 1            |
|                                 | LES400 - 30       | MDR                             | 16          | 1            | 8           | 1            | 4           | 0.5          |
| LES400 - 31                     | MDR               | 16                              | 2           | 4            | 1           | 4            | 2           |              |
| <i>Salmonella enterica</i>      | C587              | WT                              | 64          | 3.2          | 3.2         | 0.8          | 4           | 1            |

19

20 **Figure S1, related to Figure 4. Overproduction of (p)ppGpp led to decreased biofilm**  
21 **susceptibility to D-enantiomeric peptides.** Addition of SHX, which leads to overproduction of  
22 (p)ppGpp, resulted in the resistance of flow cell biofilm formation to 2.5  $\mu\text{g/ml}$  of peptide DJK-5.  
23 After 3 days, bacteria were stained green with the all bacteria stain Syto-9 prior to confocal  
24 imaging. Each panel shows reconstructions from the top in the large panel and sides in the right  
25 and bottom panels (xy, yz and xz dimensions).

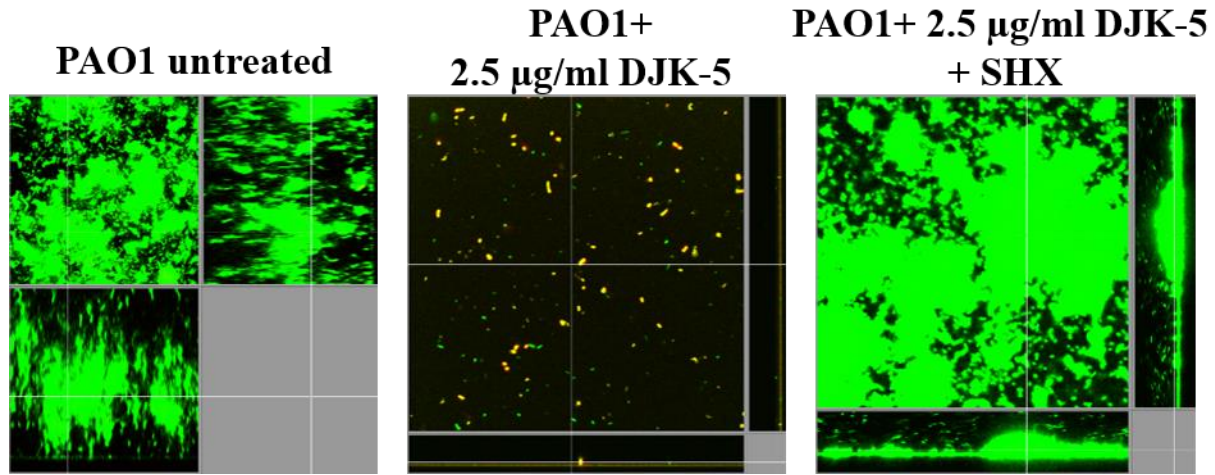

Supplement: NIHMS666700-supplement-2.pdf [file NIHMS666700-supplement-2.pdf]
